# Supplementary material for: 2.7 million samples genotyped for HLA by next generation sequencing: lessons learned
Source: PubMed Central journal article supplement (PMC5309984; doi:10.1186/s12864-017-3575-z), 2017-02-14

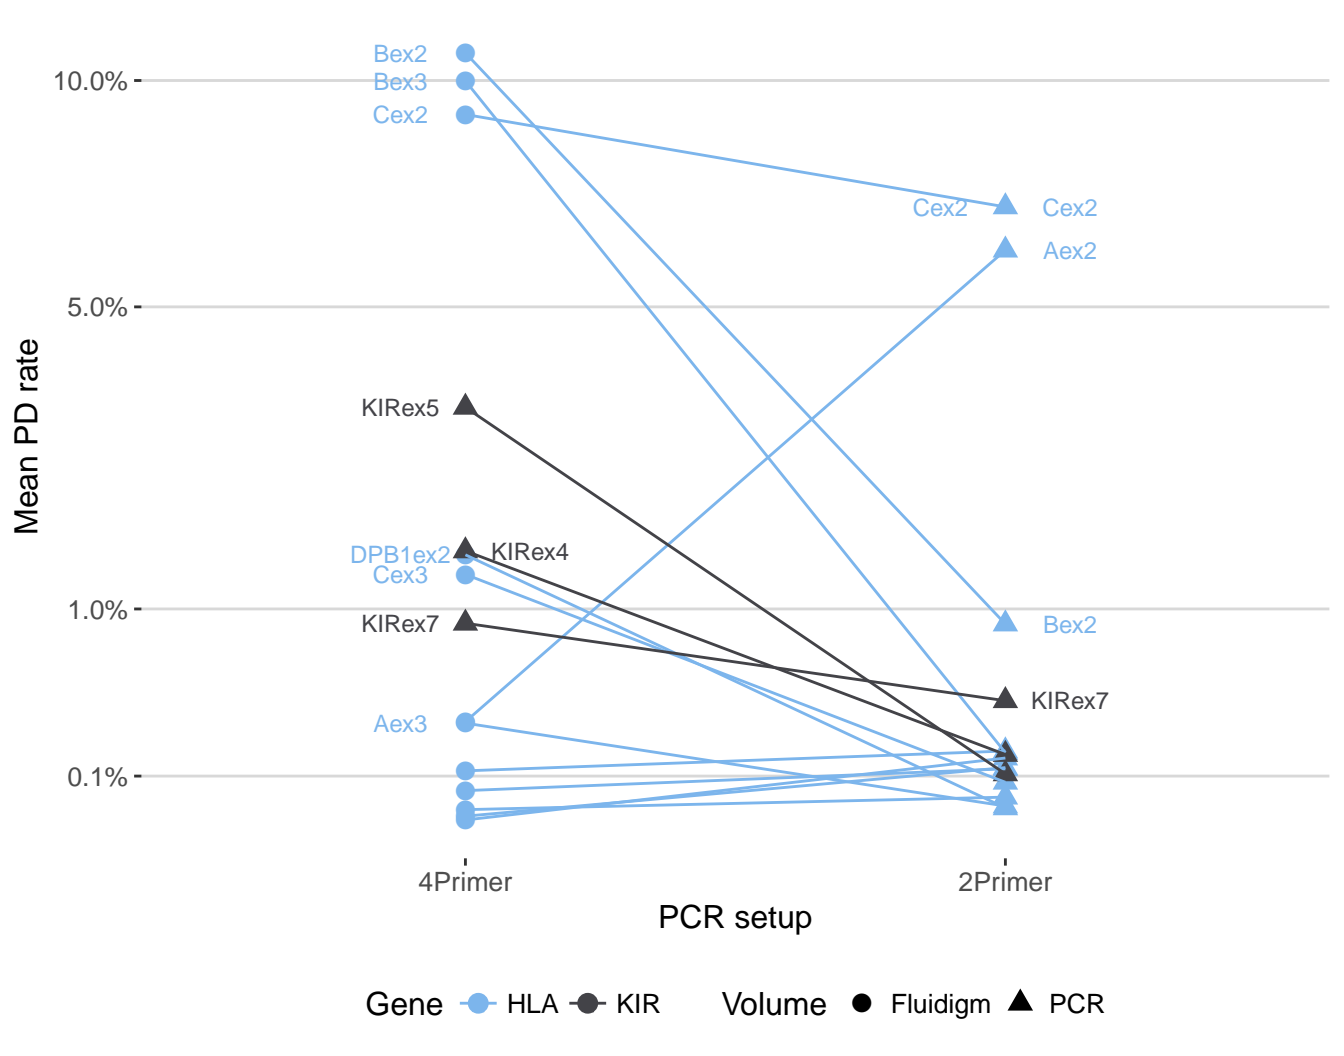

Supplement: 12864_2017_3575_MOESM4_ESM.pdf [file 12864_2017_3575_MOESM4_ESM.pdf]
