# Supplementary material for: 2.7 million samples genotyped for HLA by next generation sequencing: lessons learned
Source: PubMed Central journal article supplement (PMC5309984; doi:10.1186/s12864-017-3575-z), 2017-02-14

Average primer dimer rate

40%  
30%  
20%  
10%  
0%

Fluidigm old

Fluidigm new

384 PCR

Workflow

Locus

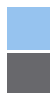

HLA-A

HLA-B

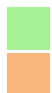

HLA-C

HLA-DRB1

HLA-DQB1

HLA-DPB1

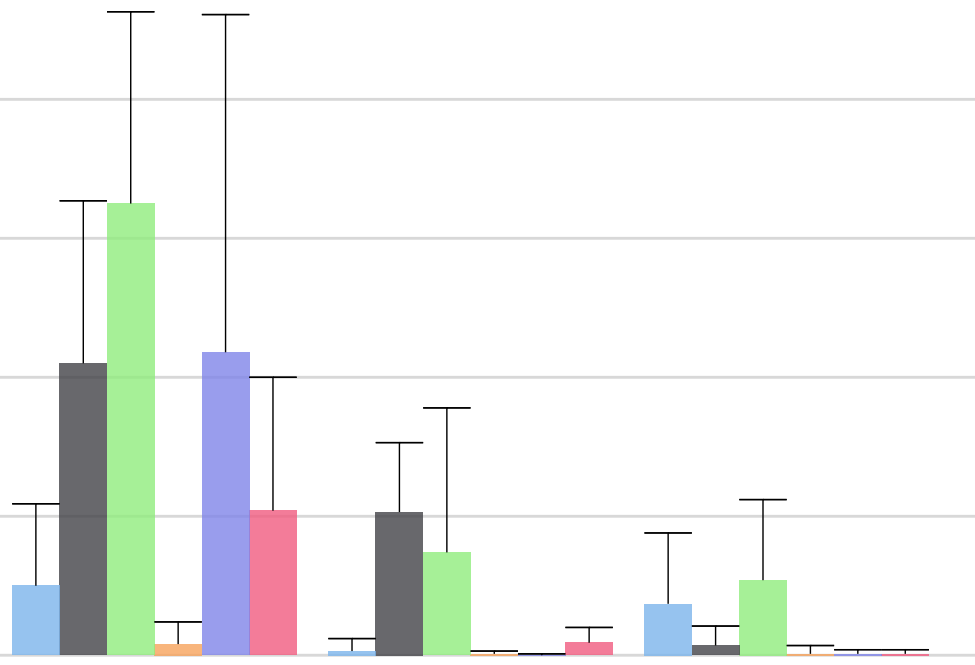

Supplement: 12864_2017_3575_MOESM6_ESM.pdf [file 12864_2017_3575_MOESM6_ESM.pdf]
